# Supplementary material
Source: Springer Nature journal article supplement (https://www.springermedizin.de/resource/supplementary/12906_2013_1895_MOESM3_ESM.pdf/9523116)
Supplement: MOESM3 [file 9523116]

Random sequence generation (selection bias)

Allocation concealment (selection bias)

Blinding of participants and personnel (performance bias)

Blinding of outcome assessment (detection bias)

Incomplete outcome data (attrition bias)

Selective reporting (reporting bias)

Other bias

Overall risk of bias

Unclear risk

Unclear risk

Low risk

High risk

Unclear risk

Unclear risk

Unclear risk

Low risk

Unclear risk

Unclear risk

Low risk

Unclear risk

Ashraf 2013

+

+

?

?

+

+

+

Dickens 1989

?

?

?

?

?

?

?

Foster 2007

+

+

+

+

+

+

+

Haslam 2001

+

?

?

-

?

-

-

Levi-Ari 2011

?

?

?

?

?

?

?

Saleki 2013

?

?

+

?

?

?

?

Scharf 2006

+

?

?

+

+

+

?

Soni 2012

+

+

+

+

+

+

+

Vas 2004

?

?

?

?

?

?

?

White 2011

+

?

+

?

?

?

?

Williamson 2007

+

+

+

+

+

+

+

Witt 2005

+

?

?

+

+

+

?

Green = low risk; yellow = unclear risk; red = high risk
